# Supplementary material for: Chemical Cross-Linking of Corneal Tissue to Reduce Progression of Loss of Sight in Patients With Keratoconus
Source: PubMed Central journal article supplement (PMC8088226; doi:10.1167/tvst.10.5.6), 2021-04-29
Supplement: tvst-10-5-6_s001.pdf [file tvst-10-5-6_s001.pdf]

Pre-crosslinking treatment (after PBS overnight)

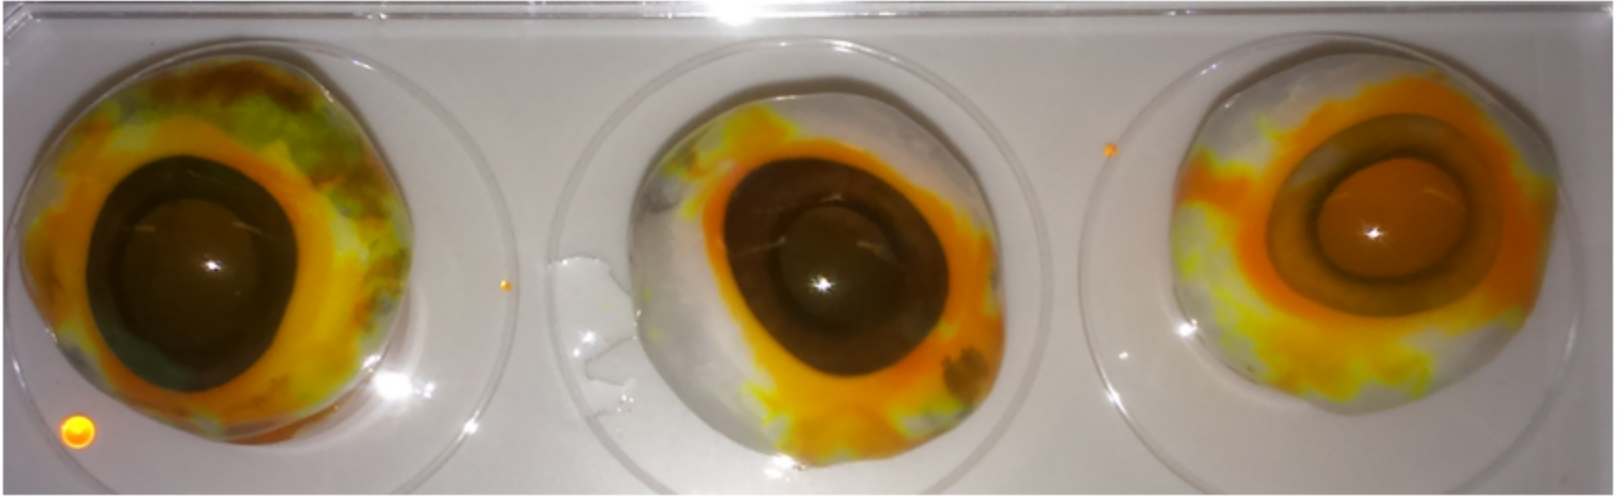

Post-crosslinking treatment

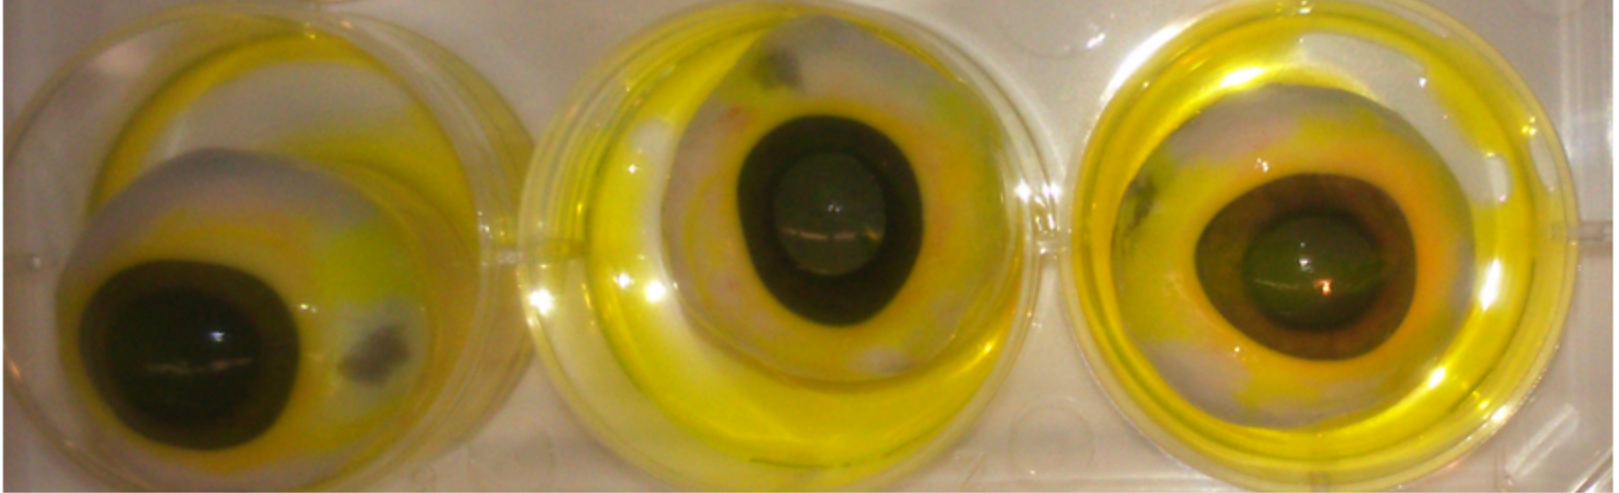

**Supplementary figure S1:** Representative photograph of porcine globes treated with fluorescein to confirm epithelium integrity, after storage in PBS overnight and before and after cross-linker treatment.
